# Supplementary material
Source: publisher figshare collection journal article supplement (https://gsajournals.figshare.com/ndownloader/files/25271231)
Supplement: Supplementary file 1 [file 25271231]

## Sheet: biological process
Category	Term	Count	%	PValue	Genes	List Total	Pop Hits	Pop Total	Fold Enrichment	Bonferroni	Benjamini	FDR
GOTERM_BP_DIRECT	GO:0042254~ribosome biogenesis	142	26.5918	3.88701e-108	S000000100, S000000752, S000005813, S000002720, S000006132, S000004176, S000000346, S000003999, S000000928, S000001082, S000000929, S000005820, S000006138, S000005151, S000005321, S000006347, S000006348, S000001897, S000005530, S000003046, S000004401, S000003658, S000001497, S000006341, S000002732, S000001281, S000001492, S000005732, S000000884, S000004187, S000001212, S000003512, S000002467, S00…	498	199	5557	7.96244	3.30784e-105	3.30784e-105	6.015e-105
GOTERM_BP_DIRECT	GO:0006364~rRNA processing	128	23.97	4.74906e-85	S000000100, S000000752, S000005813, S000006003, S000004176, S000000346, S000000928, S000000929, S000005153, S000002269, S000005321, S000006347, S000006348, S000005530, S000003046, S000004852, S000004401, S000001497, S000006341, S000002732, S000001492, S000000884, S000004186, S000004187, S000001212, S000003512, S000003517, S000003139, S000005005, S000005337, S000004903, S000005527, S000000559, S00…	498	206	5557	6.93352	4.04145e-82	2.02073e-82	7.34901e-82
GOTERM_BP_DIRECT	GO:0031167~rRNA methylation	46	8.61423	4.04207e-36	S000000100, S000000752, S000004842, S000006047, S000005813, S000006187, S000002806, S000001561, S000003322, S000003645, S000001582, S000003934, S000004212, S000002172, S000005837, S000004735, S000003091, S000004176, S000003605, S000001107, S000006138, S000002490, S000000564, S000004558, S000005019, S000002857, S000006348, S000005530, S000004401, S000005370, S000006341, S000002732, S000002312, S00…	498	59	5557	8.69995	3.4398e-33	1.1466e-33	6.25495e-33
GOTERM_BP_DIRECT	GO:0042273~ribosomal large subunit biogenesis	39	7.30337	6.48356e-29	S000000471, S000000023, S000005504, S000003957, S000006132, S000004652, S000000346, S000003999, S000000928, S000005798, S000002498, S000003079, S000005820, S000005054, S000000804, S000002221, S000005964, S000002490, S000004389, S000003394, S000004947, S000001451, S000001897, S000006014, S000001504, S000005329, S000003658, S000003335, S000005732, S000001492, S000002467, S000001655, S000006220, S00…	498	53	5557	8.21107	5.51751e-26	1.37938e-26	1.00331e-25
GOTERM_BP_DIRECT	GO:0000463~maturation of LSU-rRNA from tricistronic rRNA transcript (SSU-rRNA, 5.8S rRNA, LSU-rRNA)	31	5.80524	8.62559e-26	S000006067, S000000023, S000001130, S000005504, S000005401, S000006132, S000004652, S000000346, S000000928, S000005798, S000001108, S000005054, S000005964, S000000808, S000001127, S000005321, S000001789, S000004947, S000004266, S000006347, S000001504, S000002189, S000001497, S000003335, S000001732, S000006220, S000001094, S000003088, S000005005, S000004903, S000000559	498	37	5557	9.34913	7.34037e-23	1.46807e-23	1.33478e-22
GOTERM_BP_DIRECT	GO:0000447~endonucleolytic cleavage in ITS1 to separate SSU-rRNA from 5.8S rRNA and LSU-rRNA from tricistronic rRNA transcript (SSU-rRNA, 5.8S rRNA, LSU-rRNA)	33	6.17978	2.42043e-25	S000000100, S000004842, S000003645, S000001582, S000004212, S000005837, S000004176, S000003605, S000000929, S000005820, S000000451, S000005671, S000003547, S000000643, S000006316, S000000564, S000004558, S000002857, S000006348, S000004041, S000005252, S000001897, S000005530, S000005370, S000002312, S000000884, S000001212, S000004119, S000003139, S000002307, S000005337, S000000653, S000003762	498	43	5557	8.5636	2.05978e-22	3.43297e-23	3.74552e-22
GOTERM_BP_DIRECT	GO:0000480~endonucleolytic cleavage in 5'-ETS of tricistronic rRNA transcript (SSU-rRNA, 5.8S rRNA, LSU-rRNA)	28	5.24345	5.61793e-25	S000000100, S000004842, S000003645, S000001582, S000004212, S000005837, S000004176, S000003605, S000000929, S000006138, S000003547, S000006316, S000004558, S000002857, S000006348, S000004041, S000001897, S000005530, S000005370, S000002312, S000000884, S000001212, S000004119, S000003139, S000002307, S000005337, S000000653, S000003762	498	31	5557	10.0788	4.78086e-22	6.82979e-23	8.69354e-22
GOTERM_BP_DIRECT	GO:0000462~maturation of SSU-rRNA from tricistronic rRNA transcript (SSU-rRNA, 5.8S rRNA, LSU-rRNA)	41	7.6779	2.27455e-24	S000001239, S000000752, S000006047, S000002218, S000005813, S000006187, S000002806, S000005582, S000001561, S000002707, S000003322, S000003645, S000003934, S000004212, S000004058, S000005933, S000004735, S000001107, S000003377, S000001768, S000005151, S000002857, S000005530, S000004427, S000007608, S000003335, S000001281, S000002732, S000002312, S000004699, S000000884, S000000033, S000004119, S00…	498	71	5557	6.44372	1.93564e-21	2.41955e-22	3.51979e-21
GOTERM_BP_DIRECT	GO:0000472~endonucleolytic cleavage to generate mature 5'-end of SSU-rRNA from (SSU-rRNA, 5.8S rRNA, LSU-rRNA)	28	5.24345	3.28967e-24	S000000100, S000004842, S000003645, S000001582, S000004212, S000005837, S000004176, S000003605, S000006138, S000005671, S000003547, S000006316, S000004558, S000002857, S000006348, S000004041, S000001897, S000005530, S000005370, S000002312, S000000884, S000001212, S000004119, S000003139, S000002307, S000005337, S000000653, S000003762	498	32	5557	9.76381	2.79951e-21	3.11057e-22	5.09065e-21
GOTERM_BP_DIRECT	GO:0042274~ribosomal small subunit biogenesis	22	4.11985	4.13109e-16	S000004616, S000005019, S000006348, S000005813, S000005329, S000004401, S000005582, S000004328, S000004882, S000001191, S000004176, S000002307, S000001565, S000003377, S000002372, S000001768, S000004903, S000001626, S000005076, S000000564, S000006147, S000001353	498	30	5557	8.183	3.7792e-13	3.77476e-14	6.88338e-13
GOTERM_BP_DIRECT	GO:0000466~maturation of 5.8S rRNA from tricistronic rRNA transcript (SSU-rRNA, 5.8S rRNA, LSU-rRNA)	17	3.18352	1.01227e-14	S000006347, S000000023, S000001130, S000001504, S000002189, S000001497, S000003335, S000004652, S000006220, S000000346, S000000928, S000005798, S000001094, S000003088, S000000559, S000001789, S000005321	498	19	5557	9.98404	8.59768e-12	7.81597e-13	1.56319e-11
GOTERM_BP_DIRECT	GO:0000027~ribosomal large subunit assembly	22	4.11985	8.66475e-13	S000001451, S000001504, S000001130, S000005440, S000001465, S000004211, S000004096, S000001492, S000002720, S000003931, S000005126, S000002467, S000003999, S000000668, S000001108, S000000780, S000001894, S000005437, S000001127, S000003067, S000001789, S000001240	498	39	5557	6.29461	7.37416e-10	6.14514e-11	1.34093e-09
GOTERM_BP_DIRECT	GO:0032259~methylation	30	5.61798	1.30431e-10	S000002527, S000002360, S000005600, S000006187, S000004053, S000000475, S000001031, S000002270, S000000238, S000001112, S000002172, S000001358, S000004176, S000000265, S000002873, S000000643, S000002490, S000000120, S000001764, S000005484, S000005485, S000001326, S000003985, S000005005, S000005501, S000005547, S000003389, S000004927, S000003661, S000000559	498	87	5557	3.84781	1.10997e-07	8.53823e-09	2.01838e-07
GOTERM_BP_DIRECT	GO:0030488~tRNA methylation	15	2.80899	6.74822e-10	S000002527, S000002360, S000005329, S000004872, S000002270, S000001112, S000000265, S000002572, S000005501, S000005006, S000000120, S000005484, S000001764, S000003661, S000005485	498	23	5557	7.27737	5.74273e-07	4.10195e-08	1.04426e-06
GOTERM_BP_DIRECT	GO:0010501~RNA secondary structure unwinding	16	2.99625	9.67545e-10	S000004266, S000003570, S000003046, S000002189, S000005730, S000003931, S000001212, S000001732, S000000346, S000003139, S000001107, S000001894, S000003674, S000004903, S000002428, S000005321	498	27	5557	6.61252	8.2338e-07	5.4892e-08	1.49724e-06
GOTERM_BP_DIRECT	GO:0008033~tRNA processing	29	5.43071	3.81809e-09	S000002527, S000002360, S000003137, S000000066, S000002270, S000001112, S000002172, S000001104, S000000265, S000002572, S000001787, S000005076, S000000120, S000001764, S000005484, S000005485, S000004422, S000002209, S000004872, S000004393, S000006104, S000001270, S000005236, S000006128, S000005501, S000005006, S000004545, S000005063, S000003661	498	93	5557	3.47957	3.24919e-06	2.03074e-07	5.90835e-06
GOTERM_BP_DIRECT	GO:0000054~ribosomal subunit export from nucleus	9	1.68539	1.38941e-06	S000006220, S000003517, S000006014, S000002498, S000005153, S000003067, S000002388, S000003065, S000001240	498	12	5557	8.36898	0.00118169	6.95498e-05	0.00215004
GOTERM_BP_DIRECT	GO:1902626~assembly of large subunit precursor of preribosome	8	1.49813	4.15319e-06	S000006132, S000003999, S000006220, S000006014, S000002189, S000005005, S000001894, S000001789	498	10	5557	8.92691	0.00352813	0.000196335	0.00642671
GOTERM_BP_DIRECT	GO:0006413~translational initiation	16	2.99625	1.79016e-05	S000003767, S000006367, S000005730, S000002837, S000000033, S000006220, S000003286, S000002498, S000003315, S000000827, S000006245, S000003674, S000000283, S000004926, S000003394, S000000760	498	50	5557	3.57076	0.015119	0.00080149	0.0276985
GOTERM_BP_DIRECT	GO:0000055~ribosomal large subunit export from nucleus	11	2.05993	6.22664e-05	S000002769, S000006067, S000002508, S000001130, S000003477, S000004064, S000001213, S000005820, S000000055, S000000808, S000003957	498	27	5557	4.54611	0.0516108	0.00264601	0.0963115
GOTERM_BP_DIRECT	GO:0042797~tRNA transcription from RNA polymerase III promoter	9	1.68539	7.55254e-05	S000001733, S000005057, S000006394, S000002309, S000005286, S000005642, S000006314, S000005095, S000005733	498	18	5557	5.57932	0.0622524	0.00305601	0.116809
GOTERM_BP_DIRECT	GO:0000470~maturation of LSU-rRNA	8	1.49813	8.62721e-05	S000006141, S000000752, S000005329, S000005798, S000002367, S000001894, S000001768, S000003968	498	14	5557	6.37636	0.0707902	0.00333174	0.13342
GOTERM_BP_DIRECT	GO:0006396~RNA processing	11	2.05993	0.000173305	S000004842, S000002857, S000002209, S000004411, S000004165, S000005236, S000004852, S000005370, S000002270, S000005527, S000001764	498	30	5557	4.0915	0.137134	0.00639233	0.267847
GOTERM_BP_DIRECT	GO:0006386~termination of RNA polymerase III transcription	8	1.49813	0.000245239	S000005057, S000006394, S000002309, S000005286, S000005642, S000006314, S000005095, S000005733	498	16	5557	5.57932	0.188381	0.00865913	0.378826
GOTERM_BP_DIRECT	GO:0009116~nucleoside metabolic process	8	1.49813	0.000245239	S000001664, S000002807, S000004484, S000001170, S000004007, S000005295, S000001003, S000002849	498	16	5557	5.57932	0.188381	0.00865913	0.378826
GOTERM_BP_DIRECT	GO:0000154~rRNA modification	6	1.1236	0.000250066	S000004187, S000006187, S000004165, S000006341, S000005076, S000005837	498	8	5557	8.36898	0.191709	0.00847718	0.386269
GOTERM_BP_DIRECT	GO:0006400~tRNA modification	12	2.24719	0.000260182	S000002360, S000005329, S000005236, S000002572, S000006128, S000004393, S000005501, S000004545, S000000120, S000001112, S000001764, S000005484	498	37	5557	3.61902	0.198639	0.00848091	0.401866
GOTERM_BP_DIRECT	GO:0042790~transcription of nuclear large rRNA transcript from RNA polymerase I promoter	8	1.49813	0.000385063	S000005192, S000003824, S000004507, S000006214, S000006003, S000005867, S000003684, S000005868	498	17	5557	5.25112	0.279458	0.0120656	0.594213
GOTERM_BP_DIRECT	GO:0045943~positive regulation of transcription from RNA polymerase I promoter	8	1.49813	0.000385063	S000001239, S000006047, S000001248, S000002806, S000003645, S000002732, S000004699, S000003360	498	17	5557	5.25112	0.279458	0.0120656	0.594213
GOTERM_BP_DIRECT	GO:0030490~maturation of SSU-rRNA	7	1.31086	0.00123144	S000004616, S000004842, S000005329, S000003139, S000005582, S000003088, S000005382	498	15	5557	5.20736	0.649574	0.0367576	1.88873
GOTERM_BP_DIRECT	GO:0006360~transcription from RNA polymerase I promoter	8	1.49813	0.0016774	S000005192, S000003824, S000005057, S000006214, S000005867, S000006314, S000003684, S000005868	498	21	5557	4.25091	0.760371	0.0480705	2.56444
GOTERM_BP_DIRECT	GO:0015750~pentose transport	4	0.749064	0.00265603	S000001134, S000004613, S000002750, S000001136	498	4	5557	11.1586	0.895993	0.0726675	4.03205
GOTERM_BP_DIRECT	GO:0000451~rRNA 2'-O-methylation	4	0.749064	0.00265603	S000004187, S000000752, S000002172, S000005837	498	4	5557	11.1586	0.895993	0.0726675	4.03205
GOTERM_BP_DIRECT	GO:0042759~long-chain fatty acid biosynthetic process	4	0.749064	0.00265603	S000001665, S000003023, S000006152, S000005299	498	4	5557	11.1586	0.895993	0.0726675	4.03205
GOTERM_BP_DIRECT	GO:0006385~transcription elongation from RNA polymerase III promoter	8	1.49813	0.00302083	S000005057, S000006394, S000002309, S000005286, S000005642, S000006314, S000005095, S000005733	498	23	5557	3.88126	0.923817	0.0796968	4.57379
GOTERM_BP_DIRECT	GO:0007064~mitotic sister chromatid cohesion	9	1.68539	0.00306367	S000003833, S000005670, S000001886, S000006345, S000000566, S000005206, S000003610, S000000292, S000004681	498	29	5557	3.46302	0.926552	0.0783589	4.63723
GOTERM_BP_DIRECT	GO:0008361~regulation of cell size	9	1.68539	0.00480202	S000005192, S000000038, S000001248, S000004334, S000001108, S000003222, S000002984, S000001003, S000000297	498	31	5557	3.2396	0.983367	0.116737	7.17819
GOTERM_BP_DIRECT	GO:0006446~regulation of translational initiation	7	1.31086	0.00489836	S000003315, S000000283, S000006245, S000003674, S000004926, S000002837, S000000033	498	19	5557	4.11108	0.984682	0.115652	7.31714
GOTERM_BP_DIRECT	GO:0001731~formation of translation preinitiation complex	7	1.31086	0.00489836	S000003767, S000006367, S000001871, S000000827, S000000283, S000004926, S000002837	498	19	5557	4.11108	0.984682	0.115652	7.31714
GOTERM_BP_DIRECT	GO:0006452~translational frameshifting	5	0.93633	0.00552962	S000001106, S000003517, S000005153, S000000760, S000002388	498	9	5557	6.19924	0.991074	0.126128	8.22281
GOTERM_BP_DIRECT	GO:0070475~rRNA base methylation	4	0.749064	0.00619918	S000004176, S000004053, S000005005, S000001358	498	5	5557	8.92691	0.994968	0.136704	9.17437
GOTERM_BP_DIRECT	GO:0006383~transcription from RNA polymerase III promoter	8	1.49813	0.0064049	S000005057, S000006394, S000002309, S000005286, S000005642, S000006314, S000005095, S000005733	498	26	5557	3.43343	0.995781	0.137385	9.46487
GOTERM_BP_DIRECT	GO:0071051~polyadenylation-dependent snoRNA 3'-end processing	6	1.1236	0.00789675	S000005527, S000005176, S000005381, S000002269, S000003586, S000005243	498	15	5557	4.46345	0.998825	0.162679	11.5457
GOTERM_BP_DIRECT	GO:0071042~nuclear polyadenylation-dependent mRNA catabolic process	6	1.1236	0.00789675	S000005527, S000005176, S000005381, S000002269, S000003586, S000005243	498	15	5557	4.46345	0.998825	0.162679	11.5457
GOTERM_BP_DIRECT	GO:0006631~fatty acid metabolic process	9	1.68539	0.00871116	S000004860, S000001665, S000003023, S000006152, S000005299, S000000630, S000005362, S000001271, S000004364	498	34	5557	2.95376	0.999416	0.173797	12.6627
GOTERM_BP_DIRECT	GO:0071038~nuclear polyadenylation-dependent tRNA catabolic process	6	1.1236	0.0106575	S000005527, S000005176, S000005381, S000002269, S000003586, S000005243	498	16	5557	4.18449	0.99989	0.20384	15.2789
GOTERM_BP_DIRECT	GO:0006166~purine ribonucleoside salvage	4	0.749064	0.011579	S000002807, S000004484, S000004007, S000002849	498	6	5557	7.43909	0.99995	0.214737	16.4919
GOTERM_BP_DIRECT	GO:0010468~regulation of gene expression	5	0.93633	0.017492	S000003651, S000003674, S000004173, S000005730, S000002428	498	12	5557	4.64943	1	0.300617	23.8966
GOTERM_BP_DIRECT	GO:0006796~phosphate-containing compound metabolic process	4	0.749064	0.0189306	S000000094, S000003465, S000000296, S000000297	498	7	5557	6.37636	1	0.314935	25.6028
GOTERM_BP_DIRECT	GO:0045005~DNA-dependent DNA replication maintenance of fidelity	3	0.561798	0.0225299	S000004422, S000006379, S000002260	498	3	5557	11.1586	1	0.356435	29.7162
GOTERM_BP_DIRECT	GO:0018216~peptidyl-arginine methylation	3	0.561798	0.0225299	S000005547, S000000238, S000002873	498	3	5557	11.1586	1	0.356435	29.7162
GOTERM_BP_DIRECT	GO:0071035~nuclear polyadenylation-dependent rRNA catabolic process	6	1.1236	0.0226903	S000005527, S000005176, S000005381, S000002269, S000003586, S000005243	498	19	5557	3.52378	1	0.352115	29.8945
GOTERM_BP_DIRECT	GO:0006415~translational termination	5	0.93633	0.0306552	S000002498, S000002579, S000002837, S000004239, S000002388	498	14	5557	3.98523	1	0.437855	38.2331
GOTERM_BP_DIRECT	GO:0006450~regulation of translational fidelity	6	1.1236	0.0342486	S000001106, S000003517, S000001872, S000003137, S000005153, S000002388	498	21	5557	3.18818	1	0.467933	41.6828
GOTERM_BP_DIRECT	GO:0034475~U4 snRNA 3'-end processing	5	0.93633	0.038931	S000004852, S000005527, S000002269, S000003586, S000005243	498	15	5557	3.71954	1	0.505402	45.908
GOTERM_BP_DIRECT	GO:0006177~GMP biosynthetic process	3	0.561798	0.0424037	S000001259, S000004830, S000004424	498	4	5557	8.36898	1	0.528818	48.8548
GOTERM_BP_DIRECT	GO:0000469~cleavage involved in rRNA processing	3	0.561798	0.0424037	S000005813, S000002367, S000005582	498	4	5557	8.36898	1	0.528818	48.8548
GOTERM_BP_DIRECT	GO:0006799~polyphosphate biosynthetic process	3	0.561798	0.0424037	S000005940, S000003549, S000000874	498	4	5557	8.36898	1	0.528818	48.8548
GOTERM_BP_DIRECT	GO:0001732~formation of cytoplasmic translation initiation complex	3	0.561798	0.0424037	S000000283, S000006245, S000000033	498	4	5557	8.36898	1	0.528818	48.8548
GOTERM_BP_DIRECT	GO:0006260~DNA replication	13	2.43446	0.0428965	S000004093, S000000872, S000006379, S000003992, S000001596, S000002323, S000005206, S000002260, S000005046, S000000781, S000000131, S000000566, S000000292	498	78	5557	1.85977	1	0.525845	49.2605
GOTERM_BP_DIRECT	GO:0006633~fatty acid biosynthetic process	6	1.1236	0.0488893	S000001665, S000003023, S000006152, S000005299, S000000630, S000004364	498	23	5557	2.91095	1	0.566731	53.9601
GOTERM_BP_DIRECT	GO:0006221~pyrimidine nucleotide biosynthetic process	4	0.749064	0.0530339	S000004412, S000000135, S000003666, S000001699	498	10	5557	4.46345	1	0.590075	56.9687
GOTERM_BP_DIRECT	GO:0006797~polyphosphate metabolic process	4	0.749064	0.0530339	S000005940, S000004592, S000003549, S000000874	498	10	5557	4.46345	1	0.590075	56.9687
GOTERM_BP_DIRECT	GO:0000747~conjugation with cellular fusion	5	0.93633	0.058923	S000002197, S000001108, S000004921, S000003067, S000002720	498	17	5557	3.28195	1	0.622854	60.9286
GOTERM_BP_DIRECT	GO:0001510~RNA methylation	3	0.561798	0.0665401	S000000265, S000000559, S000001764	498	5	5557	6.69518	1	0.662145	65.5459
GOTERM_BP_DIRECT	GO:0009636~response to toxic substance	3	0.561798	0.0665401	S000003466, S000005362, S000003409	498	5	5557	6.69518	1	0.662145	65.5459
GOTERM_BP_DIRECT	GO:0042256~mature ribosome assembly	3	0.561798	0.0665401	S000005107, S000006220, S000006245	498	5	5557	6.69518	1	0.662145	65.5459
GOTERM_BP_DIRECT	GO:0002098~tRNA wobble uridine modification	6	1.1236	0.066698	S000001270, S000003634, S000003432, S000004376, S000005063, S000006007	498	25	5557	2.67807	1	0.656314	65.6359
GOTERM_BP_DIRECT	GO:0034476~U5 snRNA 3'-end processing	4	0.749064	0.0682223	S000004852, S000005527, S000002269, S000003586	498	11	5557	4.05769	1	0.658291	66.4942
GOTERM_BP_DIRECT	GO:0006273~lagging strand elongation	4	0.749064	0.0682223	S000005046, S000000131, S000002323, S000000292	498	11	5557	4.05769	1	0.658291	66.4942
GOTERM_BP_DIRECT	GO:0000467~exonucleolytic trimming to generate mature 3'-end of 5.8S rRNA from tricistronic rRNA transcript (SSU-rRNA, 5.8S rRNA, LSU-rRNA)	5	0.93633	0.0706129	S000005527, S000005176, S000005381, S000002269, S000003586	498	18	5557	3.09962	1	0.664895	67.8001
GOTERM_BP_DIRECT	GO:0006730~one-carbon metabolic process	5	0.93633	0.0706129	S000002910, S000004170, S000000417, S000000845, S000000288	498	18	5557	3.09962	1	0.664895	67.8001
GOTERM_BP_DIRECT	GO:0006412~translation	37	6.92884	0.0795787	S000000752, S000003115, S000003767, S000003838, S000002367, S000001582, S000005107, S000003091, S000003999, S000001872, S000002498, S000000827, S000003315, S000005694, S000000780, S000001768, S000000283, S000005153, S000003726, S000000760, S000003394, S000006367, S000000126, S000000289, S000005730, S000002579, S000003968, S000002837, S000000033, S000006141, S000003286, S000006220, S000006245, S00…	498	318	5557	1.29833	1	0.703792	72.2855
GOTERM_BP_DIRECT	GO:0044205~'de novo' UMP biosynthetic process	3	0.561798	0.0940206	S000004412, S000003666, S000001699	498	6	5557	5.57932	1	0.759294	78.3019
GOTERM_BP_DIRECT	GO:0031120~snRNA pseudouridine synthesis	3	0.561798	0.0940206	S000001131, S000002367, S000004165	498	6	5557	5.57932	1	0.759294	78.3019
GOTERM_BP_DIRECT	GO:0034473~U1 snRNA 3'-end processing	3	0.561798	0.0940206	S000004852, S000005527, S000002269	498	6	5557	5.57932	1	0.759294	78.3019
GOTERM_BP_DIRECT	GO:0018027~peptidyl-lysine dimethylation	3	0.561798	0.0940206	S000001326, S000000475, S000001031	498	6	5557	5.57932	1	0.759294	78.3019
GOTERM_BP_DIRECT	GO:0016075~rRNA catabolic process	3	0.561798	0.0940206	S000005381, S000002269, S000003586	498	6	5557	5.57932	1	0.759294	78.3019
GOTERM_BP_DIRECT	GO:0015867~ATP transport	3	0.561798	0.0940206	S000001648, S000000126, S000000289	498	6	5557	5.57932	1	0.759294	78.3019
GOTERM_BP_DIRECT	GO:0006267~pre-replicative complex assembly involved in nuclear cell cycle DNA replication	5	0.93633	0.0972168	S000005126, S000004093, S000003992, S000001127, S000001240	498	20	5557	2.78966	1	0.765563	79.4567

## Sheet: molecular function
Category	Term	Count	%	PValue	Genes	List Total	Pop Hits	Pop Total	Fold Enrichment	Bonferroni	Benjamini	FDR
GOTERM_MF_DIRECT	GO:0003729~mRNA binding	54	10.1124	3.56494e-15	S000000100, S000006047, S000003391, S000006138, S000000542, S000000283, S000005617, S000005964, S000003394, S000004947, S000001897, S000003616, S000001497, S000005730, S000002579, S000005732, S000004187, S000002467, S000003286, S000001655, S000003088, S000003387, S000004470, S000000653, S000002904, S000006147, S000004842, S000001259, S000004411, S000004007, S000000874, S000003934, S000005837, S00…	440	186	4885	3.22324	1.73017e-12	1.73017e-12	5.09592e-12
GOTERM_MF_DIRECT	GO:0030515~snoRNA binding	18	3.37079	5.19885e-15	S000001239, S000005019, S000002857, S000004842, S000002367, S000003645, S000006341, S000004212, S000004699, S000005837, S000001191, S000004187, S000004119, S000002307, S000002372, S000000451, S000000653, S000003360	440	21	4885	9.51623	2.54119e-12	1.27054e-12	7.4829e-12
GOTERM_MF_DIRECT	GO:0003723~RNA binding	87	16.2921	3.46638e-11	S000002527, S000003767, S000003115, S000000752, S000002368, S000006067, S000003570, S000002270, S000002773, S000002172, S000006132, S000003091, S000003391, S000001104, S000004176, S000000346, S000001107, S000005054, S000000283, S000002372, S000001768, S000000542, S000005671, S000005964, S000002269, S000005321, S000003394, S000000760, S000004947, S000005530, S000002189, S000003046, S000004852, S00…	440	477	4885	2.02494	1.68813e-08	5.62709e-09	4.97324e-08
GOTERM_MF_DIRECT	GO:0008168~methyltransferase activity	30	5.61798	5.14435e-11	S000002527, S000002360, S000005600, S000006187, S000004053, S000000475, S000001031, S000002270, S000000238, S000001112, S000002172, S000001358, S000004176, S000000265, S000002873, S000000643, S000002490, S000000120, S000001764, S000005484, S000005485, S000001326, S000003985, S000005005, S000005501, S000005547, S000003389, S000004927, S000003661, S000000559	440	84	4885	3.9651	2.5053e-08	6.26325e-09	7.38064e-08
GOTERM_MF_DIRECT	GO:0003676~nucleic acid binding	61	11.4232	1.11698e-10	S000003767, S000002368, S000003570, S000002624, S000003391, S000000346, S000001082, S000001107, S000005054, S000002372, S000005964, S000005321, S000003824, S000003046, S000002189, S000003616, S000004674, S000005730, S000003003, S000002837, S000001212, S000003512, S000003139, S000005046, S000003088, S000004903, S000005527, S000002428, S000002326, S000004842, S000000471, S000004411, S000000023, S00…	440	286	4885	2.36797	5.43968e-08	1.08794e-08	1.60253e-07
GOTERM_MF_DIRECT	GO:0004004~ATP-dependent RNA helicase activity	20	3.74532	1.14175e-10	S000004266, S000004411, S000003570, S000003046, S000002189, S000001561, S000005730, S000003931, S000001212, S000004735, S000001732, S000000346, S000003139, S000001107, S000003088, S000001894, S000003674, S000004903, S000002428, S000005321	440	39	4885	5.69347	5.56032e-08	9.2672e-09	1.63808e-07
GOTERM_MF_DIRECT	GO:0003743~translation initiation factor activity	17	3.18352	3.02723e-08	S000003767, S000006367, S000004614, S000005730, S000002837, S000000033, S000006220, S000003286, S000002498, S000000827, S000003315, S000006245, S000003674, S000000283, S000004926, S000003394, S000000760	440	37	4885	5.10104	1.47425e-05	2.10609e-06	4.34319e-05
GOTERM_MF_DIRECT	GO:0000166~nucleotide binding	117	21.9101	1.51914e-07	S000004860, S000003666, S000001484, S000006003, S000000346, S000002910, S000004170, S000006138, S000005326, S000004916, S000005153, S000004798, S000002915, S000005151, S000005321, S000004389, S000000288, S000003046, S000006345, S000001003, S000005730, S000001212, S000003139, S000005337, S000004903, S000006284, S000005527, S000006147, S000005627, S000002326, S000004411, S000001886, S000000872, S00…	440	834	4885	1.55751	7.39792e-05	9.2477e-06	0.000217951
GOTERM_MF_DIRECT	GO:0003899~DNA-directed RNA polymerase activity	15	2.80899	4.73218e-07	S000003824, S000006394, S000005286, S000005867, S000005095, S000005733, S000005868, S000005192, S000001733, S000005057, S000002309, S000005642, S000006214, S000006314, S000003684	440	34	4885	4.89806	0.000230431	2.5606e-05	0.000678927
GOTERM_MF_DIRECT	GO:0019843~rRNA binding	17	3.18352	2.08271e-06	S000004947, S000003115, S000006067, S000001130, S000005401, S000002720, S000001191, S000004176, S000001094, S000001108, S000005054, S000000780, S000002372, S000004470, S000001353, S000004239, S000001789	440	48	4885	3.93205	0.00101377	0.000101423	0.00298804
GOTERM_MF_DIRECT	GO:0000049~tRNA binding	14	2.62172	7.02542e-06	S000002527, S000002360, S000002209, S000003137, S000003947, S000005381, S000003286, S000001872, S000000827, S000004376, S000000120, S000005063, S000005484, S000003360	440	36	4885	4.31755	0.00341554	0.000310987	0.0100789
GOTERM_MF_DIRECT	GO:0004386~helicase activity	24	4.49438	1.7159e-05	S000004266, S000004422, S000004411, S000003570, S000003046, S000002189, S000001561, S000006003, S000005730, S000003931, S000001212, S000004735, S000001732, S000000346, S000003139, S000002598, S000001107, S000003088, S000001894, S000004903, S000002428, S000003586, S000000017, S000005321	440	100	4885	2.66455	0.00832167	0.000696132	0.0246153
GOTERM_MF_DIRECT	GO:0034511~U3 snoRNA binding	6	1.1236	3.18913e-05	S000004842, S000000752, S000006047, S000002218, S000006138, S000001353	440	6	4885	11.1023	0.0154113	0.001194	0.0457449
GOTERM_MF_DIRECT	GO:0001056~RNA polymerase III activity	9	1.68539	4.68455e-05	S000001733, S000005057, S000006394, S000002309, S000005286, S000005642, S000006314, S000005095, S000005733	440	17	4885	5.87767	0.022556	0.00162827	0.0671885
GOTERM_MF_DIRECT	GO:0001054~RNA polymerase I activity	8	1.49813	8.86015e-05	S000005192, S000003824, S000005057, S000006214, S000005867, S000006314, S000003684, S000005868	440	14	4885	6.34416	0.0422331	0.00287259	0.127042
GOTERM_MF_DIRECT	GO:0008186~RNA-dependent ATPase activity	7	1.31086	0.00050491	S000004422, S000003570, S000003046, S000003139, S000001107, S000003674, S000004903	440	13	4885	5.97815	0.218041	0.0152545	0.721962
GOTERM_MF_DIRECT	GO:0016740~transferase activity	87	16.2921	0.00069851	S000002527, S000003666, S000001484, S000002270, S000001487, S000006379, S000004136, S000000238, S000001112, S000001584, S000002172, S000006007, S000005192, S000001665, S000004176, S000001664, S000002910, S000004484, S000004170, S000002873, S000000643, S000001764, S000005151, S000002915, S000001248, S000001003, S000004673, S000005868, S000005733, S000000233, S000004334, S000005046, S000003518, S00…	440	694	4885	1.39178	0.288438	0.0198182	0.997498
GOTERM_MF_DIRECT	GO:0015146~pentose transmembrane transporter activity	4	0.749064	0.00269181	S000001134, S000004613, S000002750, S000001136	440	4	4885	11.1023	0.730901	0.0703308	3.79334
GOTERM_MF_DIRECT	GO:0042134~rRNA primary transcript binding	5	0.93633	0.00562037	S000005019, S000004842, S000001130, S000005437, S000006316	440	9	4885	6.16793	0.935742	0.134515	7.76803
GOTERM_MF_DIRECT	GO:0043022~ribosome binding	9	1.68539	0.0106936	S000003767, S000003286, S000006220, S000003517, S000000359, S000006284, S000006329, S000000760, S000000033	440	35	4885	2.85487	0.994678	0.230329	14.2941
GOTERM_MF_DIRECT	GO:0008757~S-adenosylmethionine-dependent methyltransferase activity	7	1.31086	0.0109206	S000004053, S000000475, S000005005, S000005501, S000000643, S000001358, S000005484	440	22	4885	3.53254	0.99524	0.224809	14.5757
GOTERM_MF_DIRECT	GO:0005524~ATP binding	77	14.4195	0.013582	S000004860, S000003571, S000003570, S000000135, S000003666, S000005008, S000001484, S000006003, S000001584, S000003957, S000001106, S000001664, S000000346, S000001872, S000002910, S000001107, S000004170, S000006138, S000003674, S000005326, S000004916, S000005153, S000004798, S000005151, S000002915, S000005321, S000000288, S000004389, S000001248, S000003046, S000002189, S000006345, S000001003, S00…	440	668	4885	1.27975	0.998719	0.261191	17.815
GOTERM_MF_DIRECT	GO:0005525~GTP binding	17	3.18352	0.020395	S000003833, S000002218, S000006014, S000002579, S000000034, S000000033, S000005107, S000000827, S000001170, S000003405, S000006138, S000006245, S000002213, S000006284, S000000808, S000003067, S000005627	440	103	4885	1.83241	0.999956	0.35358	25.594
GOTERM_MF_DIRECT	GO:0004809~tRNA (guanine-N2-)-methyltransferase activity	3	0.561798	0.0227354	S000002527, S000005329, S000005484	440	3	4885	11.1023	0.999986	0.37291	28.1042
GOTERM_MF_DIRECT	GO:0016435~rRNA (guanine) methyltransferase activity	3	0.561798	0.0227354	S000005329, S000000643, S000000559	440	3	4885	11.1023	0.999986	0.37291	28.1042
GOTERM_MF_DIRECT	GO:0008649~rRNA methyltransferase activity	3	0.561798	0.0227354	S000006187, S000002172, S000000559	440	3	4885	11.1023	0.999986	0.37291	28.1042
GOTERM_MF_DIRECT	GO:0008408~3'-5' exonuclease activity	5	0.93633	0.0238764	S000005440, S000005046, S000005527, S000002260, S000005206	440	13	4885	4.2701	0.999992	0.375469	29.2991
GOTERM_MF_DIRECT	GO:0070180~large ribosomal subunit rRNA binding	5	0.93633	0.0238764	S000004652, S000001094, S000003335, S000005964, S000001492	440	13	4885	4.2701	0.999992	0.375469	29.2991
GOTERM_MF_DIRECT	GO:0043021~ribonucleoprotein complex binding	4	0.749064	0.028655	S000004652, S000002218, S000005798, S000003335	440	8	4885	5.55114	0.999999	0.419909	34.1058
GOTERM_MF_DIRECT	GO:0016779~nucleotidyltransferase activity	16	2.99625	0.0322283	S000003137, S000006379, S000005095, S000002260, S000005206, S000005733, S000005868, S000005243, S000005192, S000000233, S000005046, S000000781, S000005642, S000006214, S000002213, S000005063	440	100	4885	1.77636	1	0.446159	37.4996
GOTERM_MF_DIRECT	GO:0016887~ATPase activity	19	3.55805	0.0337456	S000003833, S000003571, S000001886, S000003947, S000006003, S000004096, S000003957, S000003610, S000001212, S000002498, S000000838, S000004916, S000005153, S000004798, S000002504, S000006147, S000004239, S000004389, S000002388	440	127	4885	1.66097	1	0.449574	38.8908
GOTERM_MF_DIRECT	GO:0003993~acid phosphatase activity	4	0.749064	0.0401722	S000000094, S000001258, S000000296, S000000297	440	9	4885	4.93434	1	0.497692	44.4702
GOTERM_MF_DIRECT	GO:0034513~box H/ACA snoRNA binding	3	0.561798	0.0427791	S000004842, S000001131, S000002367	440	4	4885	8.3267	1	0.508227	46.5952
GOTERM_MF_DIRECT	GO:0051082~unfolded protein binding	13	2.43446	0.0563488	S000001451, S000003571, S000005008, S000003947, S000001106, S000001366, S000003517, S000004738, S000002221, S000005671, S000005153, S000004798, S000002388	440	81	4885	1.78185	1	0.597935	56.4871
GOTERM_MF_DIRECT	GO:0008175~tRNA methyltransferase activity	3	0.561798	0.0671112	S000000265, S000005501, S000005485	440	5	4885	6.66136	1	0.652585	63.0897

## Sheet: cellular component
Category	Term	Count	%	PValue	Genes	List Total	Pop Hits	Pop Total	Fold Enrichment	Bonferroni	Benjamini	FDR
GOTERM_CC_DIRECT	GO:0005730~nucleolus	172	32.2097	2.36391e-119	S000000100, S000000752, S000005813, S000002720, S000006132, S000000346, S000004176, S000003999, S000000928, S000000929, S000002200, S000005820, S000006138, S000002269, S000005321, S000006347, S000006348, S000001897, S000005530, S000005329, S000003046, S000004852, S000004401, S000001497, S000006341, S000002732, S000001281, S000001492, S000005732, S000000884, S000004186, S000004187, S000001212, S00…	524	271	5861	7.09904	5.48427e-117	5.48427e-117	3.03482e-116
GOTERM_CC_DIRECT	GO:0005654~nucleoplasm	79	14.794	3.20757e-42	S000000100, S000000752, S000006047, S000006067, S000005813, S000003432, S000001582, S000001112, S000002172, S000006007, S000003091, S000004176, S000005057, S000001107, S000002572, S000005820, S000006138, S000001240, S000006348, S000005530, S000004852, S000004401, S000005370, S000006341, S000001596, S000001800, S000002732, S000005732, S000001492, S000005733, S000000884, S000001191, S000003512, S00…	524	155	5861	5.7008	7.44157e-40	3.72079e-40	4.11793e-39
GOTERM_CC_DIRECT	GO:0030687~preribosome, large subunit precursor	60	11.236	1.37624e-40	S000002720, S000003957, S000006132, S000003999, S000000928, S000001108, S000005054, S000002997, S000005820, S000002372, S000005964, S000005321, S000004389, S000004947, S000006347, S000001451, S000001897, S000003046, S000002189, S000000124, S000005732, S000001492, S000000033, S000002467, S000001655, S000000838, S000001094, S000005005, S000004903, S000002904, S000006147, S000000559, S000000471, S00…	524	91	5861	7.3748	3.19288e-38	1.06429e-38	1.76684e-37
GOTERM_CC_DIRECT	GO:0030686~90S preribosome	55	10.2996	1.36995e-38	S000000100, S000001239, S000006047, S000005813, S000002172, S000004176, S000006138, S000002372, S000001768, S000000451, S000005671, S000006348, S000004401, S000005370, S000006341, S000002732, S000000884, S000001191, S000001212, S000004187, S000003139, S000003088, S000005337, S000004903, S000000653, S000003762, S000004842, S000002218, S000006187, S000002707, S000003322, S000003645, S000003934, S00…	524	80	5861	7.68977	3.17829e-36	7.94572e-37	1.75876e-35
GOTERM_CC_DIRECT	GO:0005634~nucleus	331	61.985	7.90837e-36	S000000100, S000000752, S000002720, S000006132, S000003999, S000003355, S000003461, S000000346, S000003466, S000001082, S000002200, S000003465, S000003858, S000006138, S000001626, S000002873, S000006347, S000006348, S000001897, S000003046, S000004401, S000006345, S000001497, S000006341, S000002732, S000001492, S000000884, S000002467, S000001212, S000001091, S000003139, S000003477, S000003341, S00…	524	2195	5861	1.68668	1.83474e-33	3.66948e-34	1.01529e-32
GOTERM_CC_DIRECT	GO:0032040~small-subunit processome	41	7.6779	1.89349e-32	S000000100, S000001239, S000000752, S000004842, S000006047, S000003570, S000002806, S000002707, S000003322, S000003645, S000001582, S000003934, S000004212, S000002172, S000005837, S000004735, S000003091, S000004176, S000000929, S000003605, S000003377, S000000564, S000004558, S000005019, S000002857, S000006348, S000005530, S000004401, S000006341, S000002732, S000002312, S000004699, S000000884, S00…	524	52	5861	8.81903	4.39289e-30	7.32148e-31	2.43088e-29
GOTERM_CC_DIRECT	GO:0030688~preribosome, small subunit precursor	19	3.55805	2.10384e-15	S000000100, S000006348, S000002218, S000006187, S000005582, S000007608, S000003645, S000000884, S000005933, S000002494, S000002307, S000002372, S000000451, S000003547, S000001626, S000002490, S000005076, S000002428, S000000564	524	23	5861	9.23988	4.89386e-13	6.99441e-14	2.70894e-12
GOTERM_CC_DIRECT	GO:0010494~cytoplasmic stress granule	27	5.05618	4.51712e-08	S000003767, S000004860, S000001849, S000001465, S000005483, S000001664, S000003466, S000002910, S000004170, S000000542, S000000283, S000003674, S000005153, S000005151, S000003394, S000006367, S000004614, S000005730, S000000034, S000002579, S000002837, S000000033, S000003387, S000000912, S000004926, S000004239, S000002326	524	91	5861	3.31866	1.04797e-05	1.30996e-06	5.79914e-05
GOTERM_CC_DIRECT	GO:0034455~t-UTP complex	7	1.31086	3.18207e-06	S000001239, S000006047, S000002806, S000003645, S000002732, S000004699, S000003360	524	7	5861	11.1851	0.000737968	8.20234e-05	0.0040851
GOTERM_CC_DIRECT	GO:0030529~intracellular ribonucleoprotein complex	51	9.55056	1.79996e-05	S000001239, S000000100, S000000752, S000003115, S000006047, S000005813, S000001582, S000002172, S000003091, S000004176, S000000929, S000005054, S000003726, S000006348, S000004401, S000006341, S000003968, S000002732, S000000884, S000006141, S000001191, S000004187, S000000653, S000003762, S000001353, S000004842, S000002367, S000001131, S000002806, S000003322, S000003645, S000003934, S000004211, S00…	524	309	5861	1.84609	0.00416724	0.000417508	0.0231057
GOTERM_CC_DIRECT	GO:0034388~Pwp2p-containing subcomplex of 90S preribosome	6	1.1236	3.09001e-05	S000002857, S000004119, S000003605, S000004401, S000004212, S000000653	524	6	5861	11.1851	0.0071433	0.000651509	0.0396627
GOTERM_CC_DIRECT	GO:0031428~box C/D snoRNP complex	6	1.1236	3.09001e-05	S000004187, S000000752, S000006341, S000004903, S000002172, S000005837	524	6	5861	11.1851	0.0071433	0.000651509	0.0396627
GOTERM_CC_DIRECT	GO:0005666~DNA-directed RNA polymerase III complex	9	1.68539	4.48402e-05	S000001733, S000005057, S000006394, S000002309, S000005286, S000005642, S000006314, S000005095, S000005733	524	17	5861	5.92153	0.0103492	0.000866554	0.0575511
GOTERM_CC_DIRECT	GO:0005736~DNA-directed RNA polymerase I complex	8	1.49813	8.51568e-05	S000005192, S000003824, S000005057, S000006214, S000005867, S000006314, S000003684, S000005868	524	14	5861	6.39149	0.0195633	0.00151863	0.10927
GOTERM_CC_DIRECT	GO:0033553~rDNA heterochromatin	7	1.31086	0.000153495	S000001239, S000006047, S000002806, S000003645, S000004470, S000004699, S000003360	524	11	5861	7.1178	0.0349869	0.0025406	0.19688
GOTERM_CC_DIRECT	GO:0043614~multi-eIF complex	6	1.1236	0.00095706	S000003767, S000000827, S000000283, S000006245, S000004926, S000002837	524	10	5861	6.71107	0.1992	0.0147005	1.22175
GOTERM_CC_DIRECT	GO:0005844~polysome	10	1.87266	0.00144636	S000001106, S000006367, S000003517, S000003616, S000000542, S000003947, S000000034, S000005153, S000006147, S000002388	524	32	5861	3.49535	0.285233	0.0207687	1.84104
GOTERM_CC_DIRECT	GO:0033290~eukaryotic 48S preinitiation complex	7	1.31086	0.00180352	S000003767, S000000827, S000000283, S000006245, S000004926, S000002837, S000000033	524	16	5861	4.89349	0.34216	0.024334	2.29082
GOTERM_CC_DIRECT	GO:0005852~eukaryotic translation initiation factor 3 complex	5	0.93633	0.00327755	S000002498, S000004614, S000000283, S000004926, S000002837	524	8	5861	6.9907	0.5331	0.0414307	4.12709
GOTERM_CC_DIRECT	GO:0009277~fungal-type cell wall	20	3.74532	0.00538597	S000004608, S000001258, S000000766, S000001956, S000003947, S000005244, S000006084, S000000094, S000001648, S000004291, S000001579, S000000813, S000003694, S000001273, S000004828, S000000296, S000004921, S000000297, S000002551, S000004924	524	114	5861	1.9623	0.714331	0.0638161	6.69838
GOTERM_CC_DIRECT	GO:0031429~box H/ACA snoRNP complex	4	0.749064	0.00616054	S000001131, S000002367, S000004165, S000004903	524	5	5861	8.94809	0.761567	0.0691743	7.62691
GOTERM_CC_DIRECT	GO:0005657~replication fork	6	1.1236	0.00782599	S000004422, S000005046, S000002323, S000002260, S000005206, S000000292	524	15	5861	4.47405	0.838423	0.0831383	9.59461
GOTERM_CC_DIRECT	GO:0034990~nuclear mitotic cohesin complex	4	0.749064	0.0115084	S000002161, S000001886, S000003610, S000004681	524	6	5861	7.45674	0.931809	0.11491	13.8089
GOTERM_CC_DIRECT	GO:0005618~cell wall	13	2.43446	0.0159365	S000004608, S000004291, S000001956, S000001579, S000000766, S000000813, S000003694, S000001273, S000004828, S000003947, S000004921, S000005244, S000004924	524	68	5861	2.13833	0.975936	0.149597	18.6364
GOTERM_CC_DIRECT	GO:0022626~cytosolic ribosome	6	1.1236	0.0178545	S000001451, S000003286, S000001871, S000002498, S000004239, S000000760	524	18	5861	3.72837	0.984696	0.159831	20.649
GOTERM_CC_DIRECT	GO:0097344~Rix1 complex	3	0.561798	0.0224328	S000005126, S000001127, S000001240	524	3	5861	11.1851	0.994824	0.189859	25.269
GOTERM_CC_DIRECT	GO:0034457~Mpp10 complex	3	0.561798	0.0224328	S000001191, S000005019, S000003762	524	3	5861	11.1851	0.994824	0.189859	25.269
GOTERM_CC_DIRECT	GO:0070545~PeBoW complex	3	0.561798	0.0224328	S000004652, S000005798, S000003335	524	3	5861	11.1851	0.994824	0.189859	25.269
GOTERM_CC_DIRECT	GO:0005732~small nucleolar ribonucleoprotein complex	5	0.93633	0.0304383	S000001131, S000000929, S000002367, S000001582, S000003762	524	14	5861	3.99468	0.999232	0.241053	32.756
GOTERM_CC_DIRECT	GO:0005576~extracellular region	17	3.18352	0.0338491	S000004608, S000000766, S000001956, S000003947, S000005244, S000004291, S000000094, S000001579, S000001721, S000000813, S000003694, S000001273, S000004828, S000000297, S000004921, S000003246, S000004924	524	110	5861	1.72861	0.999661	0.256129	35.7304
GOTERM_CC_DIRECT	GO:0000785~chromatin	4	0.749064	0.0394697	S000001259, S000001248, S000004441, S000004681	524	9	5861	4.97116	0.999912	0.283705	40.3686
GOTERM_CC_DIRECT	GO:0033254~vacuolar transporter chaperone complex	3	0.561798	0.0422265	S000005940, S000003549, S000000874	524	4	5861	8.38884	0.999955	0.291887	42.5289
GOTERM_CC_DIRECT	GO:0000178~exosome (RNase complex)	4	0.749064	0.084683	S000005527, S000005176, S000005381, S000002269	524	12	5861	3.72837	1	0.495548	67.8893
GOTERM_CC_DIRECT	GO:0071944~cell periphery	32	5.99251	0.0904911	S000001134, S000004608, S000005009, S000000138, S000003984, S000006084, S000000094, S000001383, S000004879, S000002750, S000003694, S000003549, S000003370, S000000920, S000004405, S000005379, S000004613, S000000225, S000006360, S000006361, S000001018, S000004334, S000000813, S000001273, S000000273, S000001136, S000003224, S000003389, S000000297, S000004921, S000005627, S000001197	524	272	5861	1.3159	1	0.508281	70.4091
GOTERM_CC_DIRECT	GO:0016281~eukaryotic translation initiation factor 4F complex	3	0.561798	0.0936515	S000006367, S000003674, S000003394	524	6	5861	5.59256	1	0.509781	71.7024
GOTERM_CC_DIRECT	GO:0022625~cytosolic large ribosomal subunit	15	2.80899	0.0983015	S000004947, S000003115, S000000752, S000000471, S000002367, S000001213, S000003968, S000001492, S000006141, S000002508, S000003999, S000001565, S000000780, S000001768, S000003067	524	108	5861	1.55349	1	0.516866	73.5106
